# Supplementary material
Source: publisher figshare collection journal article supplement (https://acs.figshare.com/ndownloader/files/8413148)
Supplement: Supplementary file 1 [file 8413148]

data_zhaoxh0305
_audit_creation_date              2017-03-20
_audit_creation_method
;
Olex2 1.2
(compiled 2014.09.19 svn.r3010 for OlexSys, GUI svn.r4874)
;
_publ_contact_author_address      ?
_publ_contact_author_email        ?
_publ_contact_author_name         ''
_publ_contact_author_phone        ?
_publ_section_references
;
Dolomanov, O.V., Bourhis, L.J., Gildea, R.J, Howard, J.A.K. & Puschmann, H.
 (2009), J. Appl. Cryst. 42, 339-341.
;
_chemical_name_common             ?
_chemical_name_systematic
;
 ? 
;
_chemical_formula_moiety          'C16 H27 N O3'
_chemical_formula_sum             'C16 H27 N O3'
_chemical_formula_weight          281.39
_chemical_melting_point           ?
loop_
  _atom_type_symbol
  _atom_type_description
  _atom_type_scat_dispersion_real
  _atom_type_scat_dispersion_imag
  _atom_type_scat_source
 'C' 'C' 0.0033 0.0016 'International Tables Vol C Tables 4.2.6.8 and 6.1.1.4'
 'H' 'H' 0.0000 0.0000 'International Tables Vol C Tables 4.2.6.8 and 6.1.1.4'
 'N' 'N' 0.0061 0.0033 'International Tables Vol C Tables 4.2.6.8 and 6.1.1.4'
 'O' 'O' 0.0106 0.0060 'International Tables Vol C Tables 4.2.6.8 and 6.1.1.4'

_space_group_crystal_system       'monoclinic'
_space_group_IT_number            14
_space_group_name_H-M_alt         'P 1 21/n 1'
_space_group_name_Hall            '-P 2yn'
loop_
  _space_group_symop_id
  _space_group_symop_operation_xyz
 1 'x, y, z'
 2 '-x+1/2, y+1/2, -z+1/2'
 3 '-x, -y, -z'
 4 'x-1/2, -y-1/2, z-1/2'

_cell_length_a                    12.4770(9)
_cell_length_b                    8.3561(3)
_cell_length_c                    15.4163(8)
_cell_angle_alpha                 90.00
_cell_angle_beta                  106.701(7)
_cell_angle_gamma                 90.00
_cell_volume                      1539.48(15)
_cell_formula_units_Z             4
_cell_measurement_reflns_used     1681
_cell_measurement_temperature     293(2)
_cell_measurement_theta_max       26.1830
_cell_measurement_theta_min       4.1910
_exptl_absorpt_coefficient_mu     0.083
_exptl_absorpt_correction_T_max   1.00000
_exptl_absorpt_correction_T_min   0.69106
_exptl_absorpt_correction_type    multi-scan
_exptl_absorpt_process_details
;
CrysAlisPro, Agilent Technologies,
Version 1.171.37.33 (release 27-03-2014 CrysAlis171 .NET)
(compiled Mar 27 2014,17:12:48)
Empirical absorption correction using spherical harmonics,
 implemented in SCALE3 ABSPACK scaling algorithm.
Empirical absorption correction using spherical harmonics,
 implemented in SCALE3 ABSPACK scaling algorithm.
;
_exptl_crystal_colour             'clear light colourless'
_exptl_crystal_colour_lustre      clear
_exptl_crystal_colour_modifier    light
_exptl_crystal_colour_primary     colourless
_exptl_crystal_density_diffrn     1.214
_exptl_crystal_density_meas       ?
_exptl_crystal_density_method     'not measured'
_exptl_crystal_description        block
_exptl_crystal_F_000              616
_exptl_crystal_size_max           0.37
_exptl_crystal_size_mid           0.34
_exptl_crystal_size_min           0.22
_exptl_special_details
;
 ? 
;
_diffrn_reflns_av_R_equivalents   0.0284
_diffrn_reflns_av_unetI/netI      0.0471
_diffrn_reflns_limit_h_max        15
_diffrn_reflns_limit_h_min        -15
_diffrn_reflns_limit_k_max        10
_diffrn_reflns_limit_k_min        -5
_diffrn_reflns_limit_l_max        16
_diffrn_reflns_limit_l_min        -19
_diffrn_reflns_number             6004
_diffrn_reflns_theta_full         25.50
_diffrn_reflns_theta_max          26.02
_diffrn_reflns_theta_min          3.41
_diffrn_ambient_temperature       293(2)
_diffrn_detector                  'CCD plate'
_diffrn_detector_area_resol_mean  16.0733
_diffrn_detector_type             Eos
_diffrn_measured_fraction_theta_full 0.997
_diffrn_measured_fraction_theta_max 0.997
_diffrn_measurement_details
;
#__ type_ start__ end____ width___ exp.time_
  1 omega   49.00   76.00   1.5000    6.0000
omega____ theta____ kappa____ phi______ frames
    -       20.5854  178.0000  -30.0000 18

#__ type_ start__ end____ width___ exp.time_
  2 omega   69.00   96.00   1.5000    6.0000
omega____ theta____ kappa____ phi______ frames
    -       20.5854  178.0000 -180.0000 18

#__ type_ start__ end____ width___ exp.time_
  3 omega  -17.00   82.00   1.5000    6.0000
omega____ theta____ kappa____ phi______ frames
    -       20.5854   19.0000 -180.0000 66

#__ type_ start__ end____ width___ exp.time_
  4 omega  -35.00   40.00   1.5000    6.0000
omega____ theta____ kappa____ phi______ frames
    -       20.5854  -57.0000  -30.0000 50
;
_diffrn_measurement_device        'four-circle diffractometer'
_diffrn_measurement_device_type   'SuperNova, Dual, Cu at zero, Eos'
_diffrn_measurement_method        '\w scans'
_diffrn_orient_matrix_UB_11       -0.0318208000
_diffrn_orient_matrix_UB_12       -0.0060236000
_diffrn_orient_matrix_UB_13       -0.0460890000
_diffrn_orient_matrix_UB_21       -0.0221671000
_diffrn_orient_matrix_UB_22       -0.0741967000
_diffrn_orient_matrix_UB_23       0.0091783000
_diffrn_orient_matrix_UB_31       -0.0449611000
_diffrn_orient_matrix_UB_32       0.0407763000
_diffrn_orient_matrix_UB_33       0.0098596000
_diffrn_radiation_monochromator   mirror
_diffrn_radiation_probe           x-ray
_diffrn_radiation_type            MoK\a
_diffrn_radiation_wavelength      0.71073
_diffrn_source                    'SuperNova (Mo) X-ray Source'
_diffrn_standards_decay_%         ?
_diffrn_standards_interval_count  ?
_diffrn_standards_interval_time   ?
_diffrn_standards_number          ?
_reflns_number_gt                 2026
_reflns_number_total              3035
_reflns_odcompleteness_completeness 99.70
_reflns_odcompleteness_iscentric  1
_reflns_odcompleteness_theta      26.32
_reflns_threshold_expression      >2sigma(I)
_computing_cell_refinement
;
CrysAlisPro, Agilent Technologies,
Version 1.171.37.33 (release 27-03-2014 CrysAlis171 .NET)
(compiled Mar 27 2014,17:12:48)
;
_computing_data_collection
;
CrysAlisPro, Agilent Technologies,
Version 1.171.37.33 (release 27-03-2014 CrysAlis171 .NET)
(compiled Mar 27 2014,17:12:48)
;
_computing_data_reduction
;
CrysAlisPro, Agilent Technologies,
Version 1.171.37.33 (release 27-03-2014 CrysAlis171 .NET)
(compiled Mar 27 2014,17:12:48)
;
_computing_molecular_graphics     'Olex2 (Dolomanov et al., 2009)'
_computing_publication_material   'Olex2 (Dolomanov et al., 2009)'
_computing_structure_refinement   'ShelXL (Sheldrick, 2008)'
_computing_structure_solution     'ShelXS (Sheldrick, 2008)'
_refine_diff_density_max          0.168
_refine_diff_density_min          -0.181
_refine_diff_density_rms          0.037
_refine_ls_extinction_coef        ?
_refine_ls_extinction_method      none
_refine_ls_goodness_of_fit_ref    1.055
_refine_ls_hydrogen_treatment     constr
_refine_ls_matrix_type            full
_refine_ls_number_parameters      184
_refine_ls_number_reflns          3035
_refine_ls_number_restraints      0
_refine_ls_R_factor_all           0.0821
_refine_ls_R_factor_gt            0.0524
_refine_ls_restrained_S_all       1.055
_refine_ls_shift/su_max           0.000
_refine_ls_shift/su_mean          0.000
_refine_ls_structure_factor_coef  Fsqd
_refine_ls_weighting_details
'calc w=1/[\s^2^(Fo^2^)+(0.0473P)^2^+0.1421P] where P=(Fo^2^+2Fc^2^)/3'
_refine_ls_weighting_scheme       calc
_refine_ls_wR_factor_gt           0.1105
_refine_ls_wR_factor_ref          0.1288
_refine_special_details
;
 Refinement of F^2^ against ALL reflections.  The weighted R-factor wR and 
 goodness of fit S are based on F^2^, conventional R-factors R are based 
 on F, with F set to zero for negative F^2^. The threshold expression of 
 F^2^ > 2sigma(F^2^) is used only for calculating R-factors(gt) etc. and is 
 not relevant to the choice of reflections for refinement.  R-factors based 
 on F^2^ are statistically about twice as large as those based on F, and R- 
 factors based on ALL data will be even larger. 
;
_olex2_refinement_description
;
1. Others
 Fixed Uiso: H2(0.073) H3(0.094) H2A(0.046) H2B(0.046) H3A(0.059) H4A(0.07)
 H4B(0.07) H5(0.061) H7A(0.065) H7B(0.065) H8A(0.071) H8B(0.071) H9A(0.062)
 H9B(0.062) H10A(0.053) H10B(0.053) H12A(0.071) H12B(0.071) H13A(0.109)
 H13B(0.109) H13C(0.109) H14A(0.052) H14B(0.052) H15A(0.063) H15B(0.063)
 H16A(0.071) H16B(0.071)
 Fixed X: H2(0.3244) H3(0.18) H2A(0.4364) H2B(0.3937) H3A(0.5956) H4A(0.5295)
 H4B(0.6334) H5(0.4847) H7A(0.3125) H7B(0.2861) H8A(0.12) H8B(0.1418)
 H9A(0.1933) H9B(0.0968) H10A(0.3695) H10B(0.4375) H12A(0.6163) H12B(0.5008)
 H13A(0.6092) H13B(0.6809) H13C(0.563) H14A(0.2289) H14B(0.3073) H15A(0.1349)
 H15B(0.0724) H16A(0.2252) H16B(0.0953)
 Fixed Y: H2(0.7725) H3(1.0519) H2A(1.0539) H2B(1.0446) H3A(0.9154)
 H4A(0.8729) H4B(0.7949) H5(0.6107) H7A(0.5166) H7B(0.5227) H8A(0.5531)
 H8B(0.7065) H9A(0.6782) H9B(0.7846) H10A(0.668) H10B(0.8219) H12A(0.5599)
 H12B(0.4759) H13A(1.1846) H13B(1.0877) H13C(1.1536) H14A(0.908) H14B(1.0383)
 H15A(1.1505) H15B(1.0331) H16A(1.2651) H16B(1.2919)
 Fixed Z: H2(0.2832) H3(0.1107) H2A(0.0845) H2B(0.1705) H3A(0.1539)
 H4A(0.3123) H4B(0.2913) H5(0.2791) H7A(0.1093) H7B(0.203) H8A(0.0834)
 H8B(0.145) H9A(-0.0211) H9B(-0.0059) H10A(-0.0012) H10B(-0.0081) H12A(0.1973)
 H12B(0.155) H13A(0.1907) H13B(0.2744) H13C(0.2736) H14A(-0.0863) H14B(-0.0271)
 H15A(-0.1083) H15B(-0.0599) H16A(0.0341) H16B(0.0046)
;
_atom_sites_solution_hydrogens    geom
_atom_sites_solution_primary      direct
_atom_sites_solution_secondary    difmap
loop_
  _atom_site_label
  _atom_site_type_symbol
  _atom_site_fract_x
  _atom_site_fract_y
  _atom_site_fract_z
  _atom_site_U_iso_or_equiv
  _atom_site_adp_type
  _atom_site_occupancy
  _atom_site_calc_flag
  _atom_site_disorder_assembly
  _atom_site_disorder_group
  _atom_site_refinement_flags_posn
 O1 O 0.60309(13) 0.64706(17) 0.04056(11) 0.0692(5) Uani 1 d . . .
 O2 O 0.32357(12) 0.82403(15) 0.23777(8) 0.0485(4) Uani 1 d . . .
 H2 H 0.3244 0.7725 0.2832 0.073 Uiso 1 calc . . GR
 O3 O 0.14693(14) 1.13784(18) 0.10418(10) 0.0624(4) Uani 1 d . . .
 H3 H 0.1800 1.0519 0.1107 0.094 Uiso 1 calc . . GR
 N1 N 0.24920(12) 0.88052(16) 0.04740(9) 0.0353(4) Uani 1 d . . .
 C1 C 0.36621(15) 0.83405(19) 0.09688(11) 0.0335(4) Uani 1 d . . .
 C2 C 0.43331(15) 0.98614(19) 0.13483(12) 0.0381(4) Uani 1 d . . .
 H2A H 0.4364 1.0539 0.0845 0.046 Uiso 1 calc . . R
 H2B H 0.3937 1.0446 0.1705 0.046 Uiso 1 calc . . R
 C3 C 0.55233(16) 0.9545(2) 0.19349(13) 0.0488(5) Uani 1 d . . .
 H3A H 0.5956 0.9154 0.1539 0.059 Uiso 1 calc . . R
 C4 C 0.55626(18) 0.8270(3) 0.26456(14) 0.0582(6) Uani 1 d . . .
 H4A H 0.5295 0.8729 0.3123 0.070 Uiso 1 calc . . R
 H4B H 0.6334 0.7949 0.2913 0.070 Uiso 1 calc . . R
 C5 C 0.48643(18) 0.6779(2) 0.22736(13) 0.0508(5) Uani 1 d . . .
 H5 H 0.4847 0.6107 0.2791 0.061 Uiso 1 calc . . R
 C6 C 0.36498(16) 0.7268(2) 0.17817(12) 0.0397(5) Uani 1 d . . .
 C7 C 0.28658(18) 0.5850(2) 0.14999(15) 0.0540(6) Uani 1 d . . .
 H7A H 0.3125 0.5166 0.1093 0.065 Uiso 1 calc . . R
 H7B H 0.2861 0.5227 0.2030 0.065 Uiso 1 calc . . R
 C8 C 0.16965(18) 0.6437(2) 0.10312(16) 0.0589(6) Uani 1 d . . .
 H8A H 0.1200 0.5531 0.0834 0.071 Uiso 1 calc . . R
 H8B H 0.1418 0.7065 0.1450 0.071 Uiso 1 calc . . R
 C9 C 0.17155(17) 0.7445(2) 0.02268(14) 0.0513(5) Uani 1 d . . .
 H9A H 0.1933 0.6782 -0.0211 0.062 Uiso 1 calc . . R
 H9B H 0.0968 0.7846 -0.0059 0.062 Uiso 1 calc . . R
 C10 C 0.42279(16) 0.7447(2) 0.03409(12) 0.0438(5) Uani 1 d . . .
 H10A H 0.3695 0.6680 -0.0012 0.053 Uiso 1 calc . . R
 H10B H 0.4375 0.8219 -0.0081 0.053 Uiso 1 calc . . R
 C11 C 0.52935(18) 0.6576(2) 0.07734(15) 0.0505(5) Uani 1 d . . .
 C12 C 0.53797(18) 0.5789(3) 0.16609(15) 0.0589(6) Uani 1 d . . .
 H12A H 0.6163 0.5599 0.1973 0.071 Uiso 1 calc . . R
 H12B H 0.5008 0.4759 0.1550 0.071 Uiso 1 calc . . R
 C13 C 0.6063(2) 1.1094(3) 0.23709(16) 0.0724(7) Uani 1 d . . .
 H13A H 0.6092 1.1846 0.1907 0.109 Uiso 1 calc . . GR
 H13B H 0.6809 1.0877 0.2744 0.109 Uiso 1 calc . . GR
 H13C H 0.5630 1.1536 0.2736 0.109 Uiso 1 calc . . GR
 C14 C 0.23878(16) 0.9782(2) -0.03445(11) 0.0430(5) Uani 1 d . . .
 H14A H 0.2289 0.9080 -0.0863 0.052 Uiso 1 calc . . R
 H14B H 0.3073 1.0383 -0.0271 0.052 Uiso 1 calc . . R
 C15 C 0.14099(18) 1.0933(2) -0.05235(13) 0.0523(5) Uani 1 d . . .
 H15A H 0.1349 1.1505 -0.1083 0.063 Uiso 1 calc . . R
 H15B H 0.0724 1.0331 -0.0599 0.063 Uiso 1 calc . . R
 C16 C 0.15358(19) 1.2115(2) 0.02290(15) 0.0592(6) Uani 1 d . . .
 H16A H 0.2252 1.2651 0.0341 0.071 Uiso 1 calc . . R
 H16B H 0.0953 1.2919 0.0046 0.071 Uiso 1 calc . . R

loop_
  _atom_site_aniso_label
  _atom_site_aniso_U_11
  _atom_site_aniso_U_22
  _atom_site_aniso_U_33
  _atom_site_aniso_U_23
  _atom_site_aniso_U_13
  _atom_site_aniso_U_12
 O1 0.0649(11) 0.0702(10) 0.0906(12) -0.0119(9) 0.0511(10) 0.0021(8)
 O2 0.0673(10) 0.0480(8) 0.0400(7) 0.0076(6) 0.0309(7) 0.0123(7)
 O3 0.0730(11) 0.0658(10) 0.0525(9) -0.0132(8) 0.0243(8) 0.0104(8)
 N1 0.0400(9) 0.0344(8) 0.0317(8) 0.0001(7) 0.0106(7) -0.0044(7)
 C1 0.0420(11) 0.0309(9) 0.0311(9) -0.0001(7) 0.0163(8) 0.0000(8)
 C2 0.0441(11) 0.0350(9) 0.0350(9) -0.0012(8) 0.0110(9) -0.0052(8)
 C3 0.0474(12) 0.0523(12) 0.0455(11) -0.0075(10) 0.0117(10) -0.0016(10)
 C4 0.0530(14) 0.0733(15) 0.0434(12) 0.0019(11) 0.0060(10) 0.0132(12)
 C5 0.0587(14) 0.0494(11) 0.0487(12) 0.0165(10) 0.0226(11) 0.0172(11)
 C6 0.0536(12) 0.0341(9) 0.0395(10) 0.0047(8) 0.0266(9) 0.0068(9)
 C7 0.0697(16) 0.0350(10) 0.0679(14) 0.0076(10) 0.0367(12) -0.0021(10)
 C8 0.0577(15) 0.0442(11) 0.0828(16) -0.0015(11) 0.0332(13) -0.0146(11)
 C9 0.0486(13) 0.0483(11) 0.0564(13) -0.0101(10) 0.0140(10) -0.0111(10)
 C10 0.0548(13) 0.0411(10) 0.0431(11) -0.0041(9) 0.0260(10) -0.0018(10)
 C11 0.0569(14) 0.0390(10) 0.0663(14) -0.0107(10) 0.0348(11) -0.0026(10)
 C12 0.0582(14) 0.0503(12) 0.0752(15) 0.0117(12) 0.0304(12) 0.0180(11)
 C13 0.0610(15) 0.0735(15) 0.0730(16) -0.0227(13) 0.0037(13) -0.0133(13)
 C14 0.0547(13) 0.0464(11) 0.0288(9) -0.0001(8) 0.0136(9) 0.0009(10)
 C15 0.0604(14) 0.0541(12) 0.0384(11) 0.0062(10) 0.0079(10) 0.0064(11)
 C16 0.0615(15) 0.0473(11) 0.0679(15) -0.0039(12) 0.0173(12) 0.0038(11)

_geom_special_details
;
 All esds (except the esd in the dihedral angle between two l.s. planes) 
 are estimated using the full covariance matrix.  The cell esds are taken 
 into account individually in the estimation of esds in distances, angles 
 and torsion angles; correlations between esds in cell parameters are only 
 used when they are defined by crystal symmetry.  An approximate (isotropic) 
 treatment of cell esds is used for estimating esds involving l.s. planes. 
;
loop_
  _geom_bond_atom_site_label_1
  _geom_bond_atom_site_label_2
  _geom_bond_distance
  _geom_bond_site_symmetry_2
  _geom_bond_publ_flag
 O1 C11 1.215(2) . ?
 O2 H2 0.8200 . ?
 O2 C6 1.4297(19) . ?
 O3 H3 0.8200 . ?
 O3 C16 1.420(2) . ?
 N1 C1 1.491(2) . ?
 N1 C9 1.471(2) . ?
 N1 C14 1.477(2) . ?
 C1 C2 1.542(2) . ?
 C1 C6 1.544(2) . ?
 C1 C10 1.545(2) . ?
 C2 H2A 0.9700 . ?
 C2 H2B 0.9700 . ?
 C2 C3 1.523(3) . ?
 C3 H3A 0.9800 . ?
 C3 C4 1.519(3) . ?
 C3 C13 1.523(3) . ?
 C4 H4A 0.9700 . ?
 C4 H4B 0.9700 . ?
 C4 C5 1.534(3) . ?
 C5 H5 0.9800 . ?
 C5 C6 1.542(3) . ?
 C5 C12 1.529(3) . ?
 C6 C7 1.518(3) . ?
 C7 H7A 0.9700 . ?
 C7 H7B 0.9700 . ?
 C7 C8 1.512(3) . ?
 C8 H8A 0.9700 . ?
 C8 H8B 0.9700 . ?
 C8 C9 1.505(3) . ?
 C9 H9A 0.9700 . ?
 C9 H9B 0.9700 . ?
 C10 H10A 0.9700 . ?
 C10 H10B 0.9700 . ?
 C10 C11 1.494(3) . ?
 C11 C12 1.494(3) . ?
 C12 H12A 0.9700 . ?
 C12 H12B 0.9700 . ?
 C13 H13A 0.9600 . ?
 C13 H13B 0.9600 . ?
 C13 H13C 0.9600 . ?
 C14 H14A 0.9700 . ?
 C14 H14B 0.9700 . ?
 C14 C15 1.516(3) . ?
 C15 H15A 0.9700 . ?
 C15 H15B 0.9700 . ?
 C15 C16 1.497(3) . ?
 C16 H16A 0.9700 . ?
 C16 H16B 0.9700 . ?

loop_
  _geom_angle_atom_site_label_1
  _geom_angle_atom_site_label_2
  _geom_angle_atom_site_label_3
  _geom_angle
  _geom_angle_site_symmetry_1
  _geom_angle_site_symmetry_3
  _geom_angle_publ_flag
 C6 O2 H2 109.5 . . ?
 C16 O3 H3 109.5 . . ?
 C9 N1 C1 113.98(13) . . ?
 C9 N1 C14 108.42(14) . . ?
 C14 N1 C1 114.45(13) . . ?
 N1 C1 C2 108.94(13) . . ?
 N1 C1 C6 109.25(13) . . ?
 N1 C1 C10 111.22(13) . . ?
 C2 C1 C6 107.53(14) . . ?
 C2 C1 C10 109.88(14) . . ?
 C6 C1 C10 109.94(13) . . ?
 C1 C2 H2A 108.7 . . ?
 C1 C2 H2B 108.7 . . ?
 H2A C2 H2B 107.6 . . ?
 C3 C2 C1 114.38(14) . . ?
 C3 C2 H2A 108.7 . . ?
 C3 C2 H2B 108.7 . . ?
 C2 C3 H3A 107.8 . . ?
 C2 C3 C13 110.30(16) . . ?
 C4 C3 C2 111.94(16) . . ?
 C4 C3 H3A 107.8 . . ?
 C4 C3 C13 111.06(17) . . ?
 C13 C3 H3A 107.8 . . ?
 C3 C4 H4A 108.8 . . ?
 C3 C4 H4B 108.8 . . ?
 C3 C4 C5 113.76(16) . . ?
 H4A C4 H4B 107.7 . . ?
 C5 C4 H4A 108.8 . . ?
 C5 C4 H4B 108.8 . . ?
 C4 C5 H5 107.7 . . ?
 C4 C5 C6 109.94(15) . . ?
 C6 C5 H5 107.7 . . ?
 C12 C5 C4 112.06(18) . . ?
 C12 C5 H5 107.7 . . ?
 C12 C5 C6 111.58(17) . . ?
 O2 C6 C1 106.36(13) . . ?
 O2 C6 C5 108.67(15) . . ?
 O2 C6 C7 107.76(14) . . ?
 C5 C6 C1 108.39(14) . . ?
 C7 C6 C1 112.12(15) . . ?
 C7 C6 C5 113.27(15) . . ?
 C6 C7 H7A 109.7 . . ?
 C6 C7 H7B 109.7 . . ?
 H7A C7 H7B 108.2 . . ?
 C8 C7 C6 109.73(16) . . ?
 C8 C7 H7A 109.7 . . ?
 C8 C7 H7B 109.7 . . ?
 C7 C8 H8A 109.8 . . ?
 C7 C8 H8B 109.8 . . ?
 H8A C8 H8B 108.2 . . ?
 C9 C8 C7 109.51(16) . . ?
 C9 C8 H8A 109.8 . . ?
 C9 C8 H8B 109.8 . . ?
 N1 C9 C8 112.59(16) . . ?
 N1 C9 H9A 109.1 . . ?
 N1 C9 H9B 109.1 . . ?
 C8 C9 H9A 109.1 . . ?
 C8 C9 H9B 109.1 . . ?
 H9A C9 H9B 107.8 . . ?
 C1 C10 H10A 107.9 . . ?
 C1 C10 H10B 107.9 . . ?
 H10A C10 H10B 107.2 . . ?
 C11 C10 C1 117.65(15) . . ?
 C11 C10 H10A 107.9 . . ?
 C11 C10 H10B 107.9 . . ?
 O1 C11 C10 121.56(19) . . ?
 O1 C11 C12 122.0(2) . . ?
 C10 C11 C12 116.35(16) . . ?
 C5 C12 H12A 108.9 . . ?
 C5 C12 H12B 108.9 . . ?
 C11 C12 C5 113.27(16) . . ?
 C11 C12 H12A 108.9 . . ?
 C11 C12 H12B 108.9 . . ?
 H12A C12 H12B 107.7 . . ?
 C3 C13 H13A 109.5 . . ?
 C3 C13 H13B 109.5 . . ?
 C3 C13 H13C 109.5 . . ?
 H13A C13 H13B 109.5 . . ?
 H13A C13 H13C 109.5 . . ?
 H13B C13 H13C 109.5 . . ?
 N1 C14 H14A 109.2 . . ?
 N1 C14 H14B 109.2 . . ?
 N1 C14 C15 112.03(15) . . ?
 H14A C14 H14B 107.9 . . ?
 C15 C14 H14A 109.2 . . ?
 C15 C14 H14B 109.2 . . ?
 C14 C15 H15A 109.2 . . ?
 C14 C15 H15B 109.2 . . ?
 H15A C15 H15B 107.9 . . ?
 C16 C15 C14 112.21(16) . . ?
 C16 C15 H15A 109.2 . . ?
 C16 C15 H15B 109.2 . . ?
 O3 C16 C15 112.21(16) . . ?
 O3 C16 H16A 109.2 . . ?
 O3 C16 H16B 109.2 . . ?
 C15 C16 H16A 109.2 . . ?
 C15 C16 H16B 109.2 . . ?
 H16A C16 H16B 107.9 . . ?

loop_
  _geom_torsion_atom_site_label_1
  _geom_torsion_atom_site_label_2
  _geom_torsion_atom_site_label_3
  _geom_torsion_atom_site_label_4
  _geom_torsion
  _geom_torsion_site_symmetry_1
  _geom_torsion_site_symmetry_2
  _geom_torsion_site_symmetry_3
  _geom_torsion_site_symmetry_4
  _geom_torsion_publ_flag
 O1 C11 C12 C5 143.7(2) . . . . ?
 O2 C6 C7 C8 59.3(2) . . . . ?
 N1 C1 C2 C3 175.42(13) . . . . ?
 N1 C1 C6 O2 -64.25(17) . . . . ?
 N1 C1 C6 C5 179.06(13) . . . . ?
 N1 C1 C6 C7 53.30(18) . . . . ?
 N1 C1 C10 C11 -166.22(15) . . . . ?
 N1 C14 C15 C16 62.0(2) . . . . ?
 C1 N1 C9 C8 55.4(2) . . . . ?
 C1 N1 C14 C15 -148.79(15) . . . . ?
 C1 C2 C3 C4 -48.7(2) . . . . ?
 C1 C2 C3 C13 -172.91(16) . . . . ?
 C1 C6 C7 C8 -57.4(2) . . . . ?
 C1 C10 C11 O1 -146.41(18) . . . . ?
 C1 C10 C11 C12 36.1(2) . . . . ?
 C2 C1 C6 O2 53.84(18) . . . . ?
 C2 C1 C6 C5 -62.85(17) . . . . ?
 C2 C1 C6 C7 171.39(15) . . . . ?
 C2 C1 C10 C11 73.08(19) . . . . ?
 C2 C3 C4 C5 46.5(2) . . . . ?
 C3 C4 C5 C6 -54.3(2) . . . . ?
 C3 C4 C5 C12 70.4(2) . . . . ?
 C4 C5 C6 O2 -52.73(19) . . . . ?
 C4 C5 C6 C1 62.47(18) . . . . ?
 C4 C5 C6 C7 -172.45(16) . . . . ?
 C4 C5 C12 C11 -70.8(2) . . . . ?
 C5 C6 C7 C8 179.56(15) . . . . ?
 C6 C1 C2 C3 57.13(18) . . . . ?
 C6 C1 C10 C11 -45.1(2) . . . . ?
 C6 C5 C12 C11 53.0(2) . . . . ?
 C6 C7 C8 C9 57.6(2) . . . . ?
 C7 C8 C9 N1 -56.9(2) . . . . ?
 C9 N1 C1 C2 -169.17(14) . . . . ?
 C9 N1 C1 C6 -51.97(17) . . . . ?
 C9 N1 C1 C10 69.57(17) . . . . ?
 C9 N1 C14 C15 82.75(19) . . . . ?
 C10 C1 C2 C3 -62.51(19) . . . . ?
 C10 C1 C6 O2 173.44(15) . . . . ?
 C10 C1 C6 C5 56.76(18) . . . . ?
 C10 C1 C6 C7 -69.01(19) . . . . ?
 C10 C11 C12 C5 -38.8(3) . . . . ?
 C12 C5 C6 O2 -177.69(14) . . . . ?
 C12 C5 C6 C1 -62.50(19) . . . . ?
 C12 C5 C6 C7 62.6(2) . . . . ?
 C13 C3 C4 C5 170.31(18) . . . . ?
 C14 N1 C1 C2 65.23(16) . . . . ?
 C14 N1 C1 C6 -177.57(13) . . . . ?
 C14 N1 C1 C10 -56.03(17) . . . . ?
 C14 N1 C9 C8 -175.84(15) . . . . ?
 C14 C15 C16 O3 -67.3(2) . . . . ?

_olex2_date_sample_data_collection 2015-03-04
_olex2_submission_special_instructions 'No special instructions were received'
